# Supplementary figures and images for: Purification, Physicochemical Properties, and Antioxidant Activities of Two Low-Molecular-Weight Polysaccharides from Ganoderma leucocontextum Fruiting Bodies
Source: MDPI journal article supplement (doi:10.3390/antiox10071145), 2021-07-20

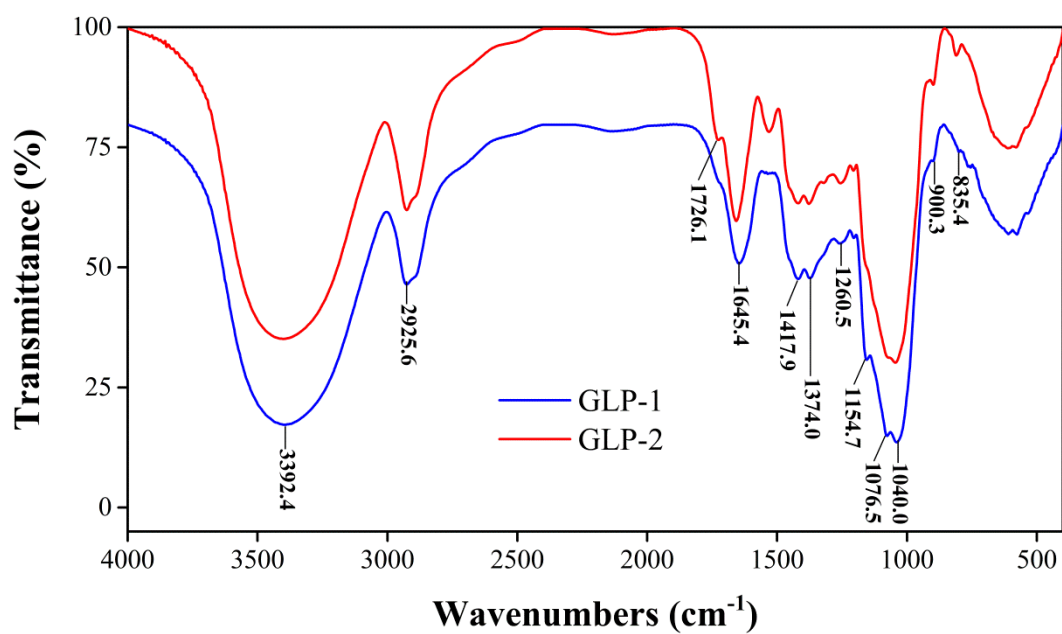

**Figure S1.** FT-IR spectra of GLP-1 and GLP-2.

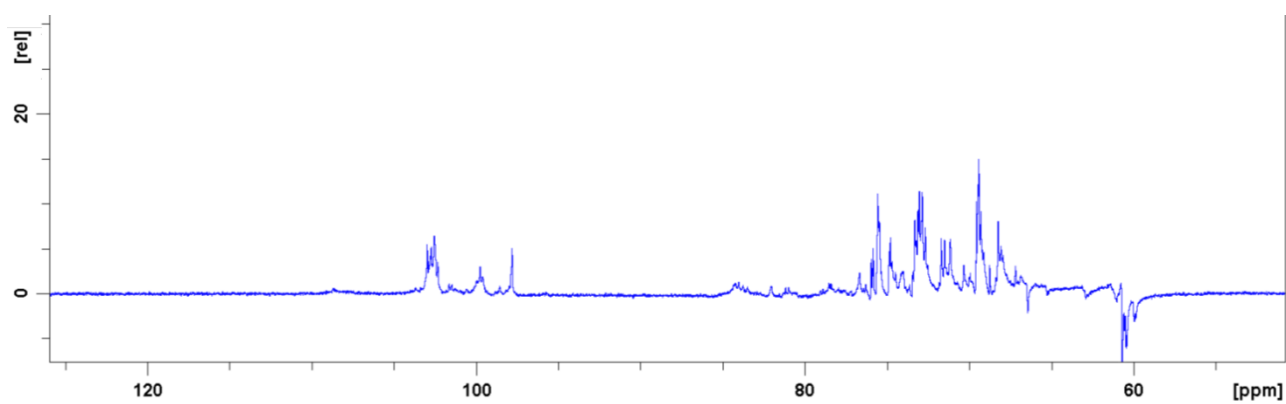

**Figure S2.** DEPT135 spectrum of GLP-1.

Supplement: s1 [file s1]
